# Supplementary material
Source: Springer Nature journal article supplement (https://www.springermedizin.de/resource/supplementary/13063_2012_1318_MOESM3_ESM.pdf/9619790)
Supplement: MOESM3 [file 9619790]

|                                                                     | 2011 | 2012 | 2013 | 2014 | 2015 |
|---------------------------------------------------------------------|------|------|------|------|------|
| Year                                                                | 1    | 2    | 3    | 4    | 5    |
| <b>Trial implementation</b>                                         |      |      |      |      |      |
| Trial protocol finalised and registered with ISRCTN                 | █    |      |      |      |      |
| Ethical approvals                                                   | █    |      |      |      |      |
| Sample frame definition, vulnerability assessment, sample selection | █    |      |      |      |      |
| Cluster-level consent for inclusion                                 | █    |      |      |      |      |
| Allocation                                                          | █    |      |      |      |      |
| Data collection                                                     | █    | █    | █    | █    |      |
| Data monitoring committee meeting                                   |      | █    | █    |      | █    |
| Trial analysis                                                      |      |      |      |      | █    |
| <b>Intervention</b>                                                 |      |      |      |      |      |
| Design of community resource centre interventions                   | █    |      |      |      |      |
| Recruitment and training of community resource centre mobilisers    | █    | █    |      |      |      |
| Planning community resource centres with community stakeholders     | █    | █    |      |      |      |
| Community resource centres active                                   |      | █    | █    | █    | █    |
| <b>Public and professional engagement</b>                           |      |      |      |      |      |
| Mumbai dissemination events                                         |      | █    | █    | █    | █    |
